# Supplementary material
Source: Springer Nature journal article supplement (https://www.springermedizin.de/resource/supplementary/12879_2007_593_MOESM1_ESM.pdf/9449338)
Supplement: MOESM1 [file 9449338]

Reactivation of resting cells,  
Thymic production,  
Homeostatic proliferation

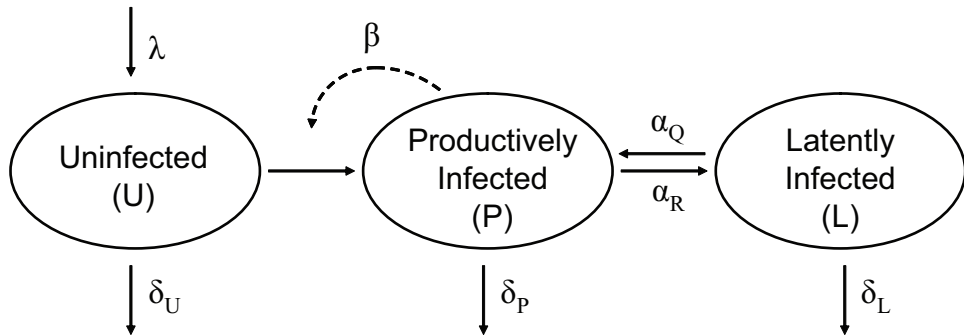

Cell death,  
Reversion to resting

Cell death

Cell death
